# Supplementary material for: Association between immunosuppressive medications and COVID-19 hospitalisation and death: a retrospective cohort study
Source: PubMed Central journal article supplement — BMJ Open. 2024 Dec 26;14(12):e087467. doi: 10.1136/bmjopen-2024-087467 (PMC11683992; doi:10.1136/bmjopen-2024-087467), 2024-12-26
Supplement: bmjopen-14-12-s002.pdf [file bmjopen-14-12-s002.pdf]

**eAppendix 2.** ICD-10 codes used to identify comorbidity risk factors for COVID-19 hospitalization or death

| <b>Condition</b>                                                                                                           | <b>ICD-10 codes</b>                                                                                                                                                                                                                                                                                                                                                                                                                                                                                                              |
|----------------------------------------------------------------------------------------------------------------------------|----------------------------------------------------------------------------------------------------------------------------------------------------------------------------------------------------------------------------------------------------------------------------------------------------------------------------------------------------------------------------------------------------------------------------------------------------------------------------------------------------------------------------------|
| <b>Asthma</b>                                                                                                              | J45.x, J46.x                                                                                                                                                                                                                                                                                                                                                                                                                                                                                                                     |
| <b>Cancer</b>                                                                                                              | C00.x-C26.x, C30.x-C34.x, C37.x-C41.x, C43.x, C45.x-C58.x, C60.x-C76.x, C81.x-C85.x, C88.x, C90.x-C97.x (malignancy)<br>C77.x-C80.x (metastatic solid tumor)                                                                                                                                                                                                                                                                                                                                                                     |
| <b>Cerebrovascular disease</b>                                                                                             | G45.x, G46.x, (TIA/vascular syndromes)<br>H34.0x, H34.1x (transient or central retinal artery occlusion)<br>I60.x, I61.x, I62.x, I63.x, I64.x, I65.x, I66.x, I67.x, I68.x<br>I69.x (cerebrovascular diseases – stroke, hemorrhage, infarction, occlusion, stenosis)                                                                                                                                                                                                                                                              |
| <b>Chronic kidney diseases</b>                                                                                             | I12.xx, I13.xx (hypertensive renal disease)<br>N03.2-N03.7 (chronic nephritic syndrome)<br>N05.2-N05.7 (unspecified nephrotic syndrome)<br>N18.xx, N19.x (chronic kidney disease and failure)<br>N25.0 (impaired renal tubular function)<br>Z49.xx (dialysis)<br>Z99.2 (dependence on renal dialysis)<br>Q61.x (cystic kidney disease),<br>E10.2, E11.2, E12.2, E13.2, E14.2 (DM with renal complications)                                                                                                                       |
| <b>Chronic lung disease</b> (limited to bronchiectasis, COPD, ILD, pulmonary embolism, pulmonary HTN)                      | J47.x (bronchiectasis)<br>J43.x, J44.x (COPD)<br>I27.20 (pulmonary hypertension)<br>I26.x (pulmonary embolism)<br>J84.x (interstitial pulmonary diseases)                                                                                                                                                                                                                                                                                                                                                                        |
| <b>Chronic liver disease</b> (cirrhosis, non-alcoholic fatty liver disease, alcoholic liver disease, autoimmune hepatitis) | I85.0, I85.9, I86.4, I98.2, I98.3, (Esophageal or gastric varices – signs of severe liver disease)<br>K70.4, K71.1, K72.1, K72.9, (hepatic failure)<br>K70.0 (alcoholic fatty liver disease), K70.9 (unspecified alcoholic liver disease, K70.30 (alcoholic cirrhosis of liver without ascites)<br>K76.0 (fatty change of liver)<br>K74.5 (biliary cirrhosis), K74.69 (other cirrhosis)<br>K76.5 (hepatic veno-occlusive disease)<br>K76.6 (portal hypertension)<br>K76.7 (hepatorenal syndrome)<br>K75.4 (Autoimmune hepatitis) |
| <b>Diabetes mellitus</b> (type 1 and 2)                                                                                    | E10.xx (DM1), E11.xx (DM2), E12.xx (malnutrition DM), E13.xx (other DM), E14.xx (unspecified DM), O24.xx (GDM)                                                                                                                                                                                                                                                                                                                                                                                                                   |
| <b>Disabilities, including Down Syndrome</b>                                                                               | F79 (unspecified intellectual disabilities)<br>F72 (severe intellectual disabilities)<br>F73 (profound intellectual disabilities)<br>F70 (mild intellectual disabilities)                                                                                                                                                                                                                                                                                                                                                        |

|                                                                                                                                                                                                                                                                                                                                           |                                                                                                                                                                                                                                                                                                                                                                                                                                                |
|-------------------------------------------------------------------------------------------------------------------------------------------------------------------------------------------------------------------------------------------------------------------------------------------------------------------------------------------|------------------------------------------------------------------------------------------------------------------------------------------------------------------------------------------------------------------------------------------------------------------------------------------------------------------------------------------------------------------------------------------------------------------------------------------------|
| <ul style="list-style-type: none"> <li>• Intellectual &amp; developmental disabilities</li> <li>• Down syndrome</li> <li>• Dependence for basic ADLs</li> <li>• Learning disabilities</li> <li>• ADL impairments</li> <li>• Spinal cord injuries</li> <li>• Cerebral palsy</li> <li>• Congenital malformations</li> <li>• ADHD</li> </ul> | <p>F71 (moderate intellectual disabilities)<br/> Q90 (down syndrome)<br/> Z73.6 (limitation of activities due to disability)<br/> G81.x, G82.x (hemiplegia, paraplegia, or quadriplegia)<br/> S24.xx (injury of thoracic spinal cord)<br/> S34.xx (injury of lumbar and sacral spinal cord)<br/> S14.xx (injury of cervical spinal cord)<br/> G80.x, (cerebral palsy)<br/> Q89.9 (congenital malformation, unspecified)<br/> F90.x (ADHD)</p>  |
| <p><b>HIV/AIDS</b></p>                                                                                                                                                                                                                                                                                                                    | <p>B20.x, B97.35, R75.x, Z21.x</p>                                                                                                                                                                                                                                                                                                                                                                                                             |
| <p><b>Heart conditions</b> (such as heart failure, coronary artery disease, or cardiomyopathies)</p>                                                                                                                                                                                                                                      | <p>109.81 (rheumatic heart failure)<br/> I11.0, I13.0, I13.2 (hypertensive heart disease with heart failure)<br/> I21.x, I22.x, I23.x, I25.x (ischemic – excluding angina and other acute ischemic heart disease)<br/> I42.x, I43.x, (cardiomyopathy)<br/> I50.x (heart failure)<br/> I25.10 (coronary artery disease)</p>                                                                                                                     |
| <p><b>Primary immunodeficiency</b></p>                                                                                                                                                                                                                                                                                                    | <p>D70.0 (congenital agranulocytosis)<br/> D71 (Functional disorders of polymorphonuclear neutrophils; <i>includes chronic granulomatous disease</i>)<br/> D80.x (Immunodeficiency with predominantly antibody defects)<br/> D81.x (combined immunodeficiencies)<br/> D82.x (Immunodeficiency associated with other major defects)<br/> D83.x (common variable immunodeficiency)<br/> D84.0 (LFA-1 defect)<br/> D84.1 (complement defects)</p> |
| <p><b>Mental health conditions</b> (mood disorders, including depression, and schizophrenia spectrum disorders)</p>                                                                                                                                                                                                                       | <p>F39 (unspecified mood disorder)<br/> F34.9 (persistent mood disorder, unspecified)<br/> F32.A (depression, unspecified)<br/> F33.x (major depressive disorder)<br/> F20.x (schizophrenia)<br/> F21.x (schizotypal disorder)<br/> F25.9 (schizoaffective disorder, unspecified)<br/> F22.x (delusional disorders)<br/> F20.81 (schizophreniform disorder)<br/> F23 (brief psychotic disorder)</p>                                            |
| <p><b>Neurologic conditions</b> (limited to dementia)</p>                                                                                                                                                                                                                                                                                 | <p>F00 (Dementia in Alzheimer disease)<br/> F01.xx (vascular dementia)<br/> F02.xx (dementia in other diseases classified elsewhere)<br/> F03.xx (unspecified dementia)</p>                                                                                                                                                                                                                                                                    |

|                                                                                                                                      |                                                                                                                                                           |
|--------------------------------------------------------------------------------------------------------------------------------------|-----------------------------------------------------------------------------------------------------------------------------------------------------------|
|                                                                                                                                      | G30.x, (Alzheimer's disease)<br>G31.1 (frontotemporal dementia)                                                                                           |
| <b>Overweight or obesity</b>                                                                                                         | E66.xx, Z68.25-Z68.29, Z68.3, Z68.4                                                                                                                       |
| <b>Pregnancy</b><br>Check for any pregnancy or delivery related codes during COVID risk period.                                      | Oxx.xxx, Z33.x, Z34.xx, Z35.x, Z37.x, Z38.xx, Z39.0, Z3A.xx                                                                                               |
| <b>Solid organ or blood stem cell transplantation</b>                                                                                | Z94.xx                                                                                                                                                    |
| <b>Autoimmune disease</b>                                                                                                            | See comprehensive autoimmune ICD codes below (modified from ZOE conditions)                                                                               |
| Multiple sclerosis                                                                                                                   | G35                                                                                                                                                       |
| Inflammatory polyneuropathy including Guillain-Barré syndrome, Miller Fisher syndrome and other variants                             | G61.0 (Guillain-Barré)<br>G61.81<br>G61.82<br>G61.9                                                                                                       |
| Myasthenia gravis (MG), including Lambert-Eaton myasthenic syndrome (LE)                                                             | G70.0 (MG)<br>G70.00 (MG)<br>G70.01 (MG)<br>G70.80 (LE)                                                                                                   |
| Systemic lupus erythematosus and associated conditions                                                                               | M32.x<br>L93.x                                                                                                                                            |
| Systemic Scleroderma (Systemic sclerosis), including diffuse systemic form and CREST syndrome (Limited cutaneous systemic sclerosis) | M34.x                                                                                                                                                     |
| Idiopathic inflammatory myopathies, including Dermatomyositis, Polymyositis                                                          | M33.x                                                                                                                                                     |
| Rheumatoid arthritis and associated conditions including Juvenile chronic arthritis and Still's disease)                             | M05.x<br>M06.x<br>M08.x<br>M09.x<br>M35.1<br>M35.9                                                                                                        |
| Chronic postrheumatic arthropathy, palindromic rheumatism                                                                            | M12.0<br>M12.3                                                                                                                                            |
| Polymyalgia rheumatica                                                                                                               | M35.3<br>M31.5                                                                                                                                            |
| Spondyloarthritis, including ankylosing spondylitis, reactive arthritis (Reiter's Syndrome) and undifferentiated spondyloarthritis   | M45.x (Ankylosing spondylitis)<br><br>M02.9 (Reactive arthritis)                                                                                          |
| Sacroiliitis, inflammatory spondylopathy                                                                                             | M46.1 (Sacroiliitis, Not Elsewhere Classified)<br>M46.8 (Other Specified Inflammatory Spondylopathies)<br>M46.9 (Inflammatory Spondylopathy, Unspecified) |
| Relapsing polychondritis                                                                                                             | M94.1 (Relapsing polychondritis)                                                                                                                          |

|                                                                                                                      |                                                                                                                                                                                                             |
|----------------------------------------------------------------------------------------------------------------------|-------------------------------------------------------------------------------------------------------------------------------------------------------------------------------------------------------------|
| Psoriatic and enteropathic arthritis; psoriasis                                                                      | M07.x (Enteropathic arthropaties)<br>M07.60<br>L40.x (Psoriasis)<br>L40.9<br>L40.50                                                                                                                         |
| Vitiligo                                                                                                             | L80                                                                                                                                                                                                         |
| Autoimmune bullous skin diseases (including pemphigus, pemphigoid and dermatitis herpetiformis)                      | L10.x (Pemphigus)<br>L10.9<br>L12.x (Pemphigoid)<br>L12.9<br>L13.0                                                                                                                                          |
| Erythema nodosum                                                                                                     | L52                                                                                                                                                                                                         |
| Alopecia areata                                                                                                      | L63.x (Alopecia areata)<br>L63.0<br>L63.1<br>L63.2<br>L63.8<br>L63.9                                                                                                                                        |
| Scleroderma, sclerodactyly                                                                                           | L94.0 (Localized scleroderma (morphea))<br>L94.1 (Linear scleroderma)<br>L94.3 (Sclerodactyly)                                                                                                              |
| Autoimmune hepatitis                                                                                                 | K75.4                                                                                                                                                                                                       |
| Primary biliary cirrhosis                                                                                            | K74.3                                                                                                                                                                                                       |
| Inflammatory bowel disease, including Crohn's disease, ulcerative colitis, microscopic colitis, ulcerative proctitis | K50.x (Crohn's disease)<br>K50.90<br>K50.919<br>K51.x (Ulcerative colitis)<br>K51.90<br>K51.919<br>K52.83x (Microscopic colitis)<br>K52.839<br>K51.2x (Ulcerative (chronic) proctitis)<br>K51.20<br>K51.219 |
| Celiac disease                                                                                                       | K90.0                                                                                                                                                                                                       |
| Autoimmune thyroiditis (including Hashimoto thyroiditis)                                                             | E06.3 (Autoimmune thyroiditis)                                                                                                                                                                              |
| Primary adrenocortical insufficiency                                                                                 | E27.1                                                                                                                                                                                                       |
| Polyglandular autoimmune syndrome                                                                                    | E31.0                                                                                                                                                                                                       |
| Large vessels vasculitis including giant cell arteritis such as Takayasu's arteritis and temporal arteritis.         | M31.6<br>M31.4                                                                                                                                                                                              |
| Medium sized and/or small vessels vasculitis including: polyarteritis nodosa, Kawasaki's disease,                    | M30.x<br>M31.0-M31.3, M31.7<br>I73.1                                                                                                                                                                        |

|                                                                                                                                                                                                                                                                                                                                                        |                                                                                                        |
|--------------------------------------------------------------------------------------------------------------------------------------------------------------------------------------------------------------------------------------------------------------------------------------------------------------------------------------------------------|--------------------------------------------------------------------------------------------------------|
| microscopic polyangiitis, Wegener's granulomatosis, Churg–Strauss syndrome (allergic granulomatous angiitis), Buerger's disease (thromboangiitis obliterans), necrotizing vasculitis and anti-neutrophil cytoplasmic antibody (ANCA) positive vasculitis (type unspecified), Henoch-Schonlein purpura, Behcet's syndrome, leukocytoclastic vasculitis. | D69.0<br>M35.2                                                                                         |
| Autoimmune hemolytic anemia                                                                                                                                                                                                                                                                                                                            | D59.1x (Other autoimmune hemolytic anemias)<br>D59.10<br>D59.11<br>D59.12<br>D59.13<br>D59.19<br>D59.0 |
| Immune thrombocytopenic purpura                                                                                                                                                                                                                                                                                                                        | D69.3                                                                                                  |
| Pernicious anemia                                                                                                                                                                                                                                                                                                                                      | D51.0                                                                                                  |
| Autoimmune aplastic anemia                                                                                                                                                                                                                                                                                                                             | D61.3                                                                                                  |
| Sarcoidosis                                                                                                                                                                                                                                                                                                                                            | D86.x (Sarcoidosis)<br>D86.9                                                                           |
| Sjögren's syndrome                                                                                                                                                                                                                                                                                                                                     | M35.0x (Sjögren's syndrome)                                                                            |
