# Supplementary material for: Association between immunosuppressive medications and COVID-19 hospitalisation and death: a retrospective cohort study
Source: PubMed Central journal article supplement — BMJ Open. 2024 Dec 26;14(12):e087467. doi: 10.1136/bmjopen-2024-087467 (PMC11683992; doi:10.1136/bmjopen-2024-087467), 2024-12-26
Supplement: bmjopen-14-12-s003.pdf [file bmjopen-14-12-s003.pdf]

### eAppendix 3. COVID-19 outpatient treatment identification

| <b>Generic name (Brand name)</b>            | <b>CPT/HCPCS Code</b>                           |
|---------------------------------------------|-------------------------------------------------|
| NIRMATRELVIR-RITONAVIR (PAXLOVID)           | Searched by pharmacy claims text                |
| REMDESIVIR (VEKLURY)                        | J0248                                           |
| BEBTELOVIMAB                                | Q0222, M0222, M0223, Q0239, M0239               |
| SOTROVIMAB                                  | Q0247, M0247, M0248                             |
| CASIRIVIMAB-IMDEVIMAB (REGENCOV, RONAPREVE) | Q0240, M0240, M0241, Q0243, M0243, Q0244, M0244 |
| BAMLANIVIMAB-ETSEVIMAB                      | Q0245, M0245, M0246                             |
| MOLNUPIRAVIR (LAGEVRIO)                     | Searched by pharmacy claims text                |
| TIXAGEVIMAB PLUS CILGAVIMAB (EVUSHELD)      | Q0220, Q0221, M0220, M0221                      |

COVID-19 outpatient treatments were identified by CPT/HCPCS codes and/or searching pharmacy claims text for generic and brand names associated with an outpatient encounter.
