# Supplementary material for: Association between immunosuppressive medications and COVID-19 hospitalisation and death: a retrospective cohort study
Source: PubMed Central journal article supplement — BMJ Open. 2024 Dec 26;14(12):e087467. doi: 10.1136/bmjopen-2024-087467 (PMC11683992; doi:10.1136/bmjopen-2024-087467), 2024-12-26
Supplement: bmjopen-14-12-s004.pdf [file bmjopen-14-12-s004.pdf]

**eAppendix 4. COVID-19 inpatient treatment identification**

|                                      |                                                                                                                                                                                                                         |
|--------------------------------------|-------------------------------------------------------------------------------------------------------------------------------------------------------------------------------------------------------------------------|
| <b>COVID-19 inpatient treatments</b> | REMDESIVIR (VEKLURY)<br>DEXAMETHASONE<br>PREDNISONE<br>METHYLPRENDISOLONE<br>HYDROCORTISONE<br>BARICITINIB (OLUMIANT)<br>TOCILIZUMAB (ACTEMRA)<br>TOCILIZUMAB (ACTEMRA)<br>TOFACITINIB (XELJANZ)<br>SARILUMAB (KEVZARA) |
|--------------------------------------|-------------------------------------------------------------------------------------------------------------------------------------------------------------------------------------------------------------------------|

COVID-19 inpatient treatments were identified searching pharmacy claims text for generic and brand names associated with an inpatient encounter. Inpatient treatment was only searched if the patient was identified to have a COVID-19 related death.
