# Supplementary material for: Association between immunosuppressive medications and COVID-19 hospitalisation and death: a retrospective cohort study
Source: PubMed Central journal article supplement — BMJ Open. 2024 Dec 26;14(12):e087467. doi: 10.1136/bmjopen-2024-087467 (PMC11683992; doi:10.1136/bmjopen-2024-087467), 2024-12-26
Supplement: bmjopen-14-12-s005.pdf [file bmjopen-14-12-s005.pdf]

**eAppendix 5. COVID-19 definitions**

| <b>Covariate</b>            | <b>Definition</b>                                                                                                                                                        |
|-----------------------------|--------------------------------------------------------------------------------------------------------------------------------------------------------------------------|
| Previous COVID-19 infection | Identified by ICD-10 code U07.1 (confirmed COVID-19 infection) in any encounter type in any diagnostic position, or a positive polymerase chain reaction (PCR) lab test. |
| <b>Outcome</b>              | <b>Definition</b>                                                                                                                                                        |
| COVID-19 hospitalization    | Identified by ICD-10 code U07.1 in the first or second diagnostic position associated with an inpatient encounter during the risk period.                                |
| COVID-19 related death      | Identified by discharge status codes. Identified by code U07.1 appearing within 30 days prior to the death date.                                                         |
