# Supplementary material for: Association between immunosuppressive medications and COVID-19 hospitalisation and death: a retrospective cohort study
Source: PubMed Central journal article supplement — BMJ Open. 2024 Dec 26;14(12):e087467. doi: 10.1136/bmjopen-2024-087467 (PMC11683992; doi:10.1136/bmjopen-2024-087467), 2024-12-26
Supplement: bmjopen-14-12-s006.pdf [file bmjopen-14-12-s006.pdf]

**eAppendix 6. Procedure and drug codes for identification of COVID-19 vaccination**

| <b>Vaccine brand name</b> | <b>CPT codes</b>                 | <b>Administration codes</b>                                                                                                         |
|---------------------------|----------------------------------|-------------------------------------------------------------------------------------------------------------------------------------|
| <b>Pfizer</b>             | 91300<br>91305<br>91307<br>91308 | 0001A<br>0002A<br>0003A<br>0004A<br>0051A<br>0052A<br>0053A<br>0054A<br>0071A<br>0072A<br>0073A<br>0074A<br>0081A<br>0082A<br>0083A |
| <b>Moderna</b>            | 91301<br>91306<br>91309<br>91311 | 0011A<br>0012A<br>0013A<br>0064A<br>0094A<br>0091A<br>0092A<br>0093A<br>0111A<br>0112A<br>0113A                                     |
| <b>Janssen</b>            | 91303                            | 0031A<br>0034A                                                                                                                      |
