# Supplementary material for: Association between immunosuppressive medications and COVID-19 hospitalisation and death: a retrospective cohort study
Source: PubMed Central journal article supplement — BMJ Open. 2024 Dec 26;14(12):e087467. doi: 10.1136/bmjopen-2024-087467 (PMC11683992; doi:10.1136/bmjopen-2024-087467), 2024-12-26
Supplement: bmjopen-14-12-s007.pdf [file bmjopen-14-12-s007.pdf]

**eAppendix 7. Immunosuppressive medication categories**

| <b>Immunosuppressive medication category</b>                                                                 | <b>Medication generic names</b>                                                                                                                            |
|--------------------------------------------------------------------------------------------------------------|------------------------------------------------------------------------------------------------------------------------------------------------------------|
| <b>Systemic corticosteroids</b><br>Routes: oral, intravenous                                                 | Prednisone<br>Prednisolone<br>Methylprednisolone<br>Dexamethasone<br>Triamcinolone<br>Hydrocortisone<br>Budesonide<br>Cortisone acetate<br>Betamethasone   |
| <b>Disease-modifying anti-rheumatic drugs (DMARDs)</b><br>Routes: oral, intravenous, injection, subcutaneous | Methotrexate<br>Azathioprine<br>Mycophenolate mofetil<br>Mycophenolic acid<br>Cyclosporine Leflunomide<br>Tacrolimus                                       |
| <b>Tumor necrosis factor alpha (TNF-<math>\alpha</math>) inhibitors</b><br>Routes: intravenous, subcutaneous | Etanercept<br>Infliximab<br>Afelimomab<br>Adalimumab<br>Certolizumab pegol<br>Golimumab                                                                    |
| <b>Interleukin-6 (IL-6) inhibitors</b><br>Routes: intravenous, subcutaneous                                  | Sarilumab<br>Tocilizumab<br>Siltuximab<br>Satralizumab                                                                                                     |
| <b>Anti-CD20 monoclonal antibodies</b><br>Routes: intravenous, intramuscular, subcutaneous                   | Rituximab<br>Ocrelizumab<br>Ofatumumab<br>Ibritumomab<br>Obinutuzumab<br>Tositumomab<br>Veltuzumab                                                         |
| <b>Other biologic immunosuppressive therapies</b><br>Routes: intravenous, intramuscular, subcutaneous        | Abatacept<br>Ixekizumab<br>Secukinumab<br>Brodalumab<br>Ustekinumab<br>Guselkumab<br>Risankizumab<br>Tildrakizumab<br>Dupilumab<br>Omalizumab<br>Belimumab |

|                                                                                                         |                                                                                                                                                                                                                                                                                                                                                                           |
|---------------------------------------------------------------------------------------------------------|---------------------------------------------------------------------------------------------------------------------------------------------------------------------------------------------------------------------------------------------------------------------------------------------------------------------------------------------------------------------------|
|                                                                                                         | <p> Alefacept<br/> Efalizumab<br/> Natalizumab<br/> Eculizumab<br/> Belimumab<br/> Vedolizumab<br/> Alemtuzumab<br/> Emapalumab<br/> Ravulizumab<br/> Inebilizumab<br/> Anakinra<br/> Rilonacept<br/> Canakinumab<br/> Daclizumab<br/> Basiliximab<br/> Interferon beta-1a<br/> Interferon beta-1b<br/> Peginterferon beta-1a </p>                                        |
| <p><b>Other non-biologic immunosuppressive drugs</b></p> <p>Routes: oral, intravenous, subcutaneous</p> | <p> Sulfasalazine<br/> Apremilast<br/> Tofacitinib<br/> Baricitinib<br/> Ruxolitinib<br/> Immunoglobulin<br/> Fingolimod<br/> Teriflunomide<br/> Ozanimod<br/> Cladribine<br/> Siponimod<br/> Upadacitinib<br/> Filgotinib<br/> Dimethyl fumarate<br/> Cyclophosphamide<br/> Glatiramer acetate<br/> Mercaptopurine<br/> Diroximel fumarate<br/> Monomethyl fumarate </p> |
