# Supplementary material for: Association between immunosuppressive medications and COVID-19 hospitalisation and death: a retrospective cohort study
Source: PubMed Central journal article supplement — BMJ Open. 2024 Dec 26;14(12):e087467. doi: 10.1136/bmjopen-2024-087467 (PMC11683992; doi:10.1136/bmjopen-2024-087467), 2024-12-26
Supplement: bmjopen-14-12-s008.pdf [file bmjopen-14-12-s008.pdf]

**eAppendix 8. Equivalent doses of systemic corticosteroids**

| <b>Equivalent dose</b> | <b>Corticosteroid</b> |
|------------------------|-----------------------|
| <b>0.375 mg</b>        | Budesonide            |
| <b>0.6 mg</b>          | Bethamethasone        |
| <b>0.75 mg</b>         | Dexamethasone         |
| <b>4 mg</b>            | Methylpredisolone     |
| <b>4 mg</b>            | Triamcinolone         |
| <b>5 mg</b>            | Prednisone            |
| <b>5 mg</b>            | Prednisolone          |
| <b>20 mg</b>           | Hydrocortisone        |
| <b>25 mg</b>           | Cortisone             |
