# Supplementary material for: Association between immunosuppressive medications and COVID-19 hospitalisation and death: a retrospective cohort study
Source: PubMed Central journal article supplement — BMJ Open. 2024 Dec 26;14(12):e087467. doi: 10.1136/bmjopen-2024-087467 (PMC11683992; doi:10.1136/bmjopen-2024-087467), 2024-12-26
Supplement: bmjopen-14-12-s009.pdf [file bmjopen-14-12-s009.pdf]

**Supplemental Table S1.** Prevalence of each specific autoimmune disease in the general population cohort (N = 703,009)

| <b>Autoimmune disease</b>                     | <b>N (% of cohort)</b> |
|-----------------------------------------------|------------------------|
| Gout                                          | 180062 (1.78)          |
| Rheumatoid arthritis                          | 171969 (1.7)           |
| Psoriasis vulgaris                            | 106668 (1.06)          |
| Crohn's and ulcerative colitis                | 75405 (0.75)           |
| Autoimmune thyroiditis                        | 68187 (0.68)           |
| Systemic lupus erythematosus                  | 45563 (0.45)           |
| Multiple sclerosis                            | 29979 (0.3)            |
| Sjogren's                                     | 27825 (0.28)           |
| Polymyalgia rheumatica                        | 24255 (0.24)           |
| Celiac disease                                | 17053 (0.17)           |
| Sarcoidosis                                   | 13710 (0.14)           |
| Myasthenia gravis                             | 12682 (0.13)           |
| Alopecia areata                               | 11649 (0.12)           |
| Ankylosing spondylitis                        | 11452 (0.11)           |
| Vitiligo                                      | 9166 (0.09)            |
| Immune thrombocytopenic purpura               | 8514 (0.08)            |
| Undifferentiated spondyloarthropathy          | 8142 (0.08)            |
| Systemic sclerosis                            | 5114 (0.05)            |
| Autoimmune hepatitis                          | 3987 (0.04)            |
| Primary biliary cirrhosis                     | 3571 (0.04)            |
| Dermatopolymyositis                           | 3544 (0.04)            |
| Pemphigus and pemphigoid                      | 3455 (0.03)            |
| Juvenile arthritis                            | 2995 (0.03)            |
| Primary adrenocortical insufficiency          | 2931 (0.03)            |
| Guillain-Barré                                | 2135 (0.02)            |
| Tubulointerstitial nephritis                  | 2132 (0.02)            |
| Autoimmune hemolytic anemia                   | 1884 (0.02)            |
| Granulomatosis with polyangiitis              | 1538 (0.02)            |
| Polyarteritis nodosa                          | 1086 (0.01)            |
| Psoriatic and enteropathic arthritis          | 992 (0.01)             |
| Behcet's                                      | 752 (0.01)             |
| Relapsing polychondritis                      | 334 (0.003)            |
| Autoimmune polyglandular failure <sup>a</sup> | 196 (0.002)            |
| Reactive arthritis                            | 176 (0.002)            |
| Lambert-Eaton                                 | 82 (0.001)             |
