# Supplementary material for: Association between immunosuppressive medications and COVID-19 hospitalisation and death: a retrospective cohort study
Source: PubMed Central journal article supplement — BMJ Open. 2024 Dec 26;14(12):e087467. doi: 10.1136/bmjopen-2024-087467 (PMC11683992; doi:10.1136/bmjopen-2024-087467), 2024-12-26
Supplement: bmjopen-14-12-s010.pdf [file bmjopen-14-12-s010.pdf]

**Supplemental Table S2.** Systemic corticosteroid use<sup>a</sup> by dosage and length of exposure (N=10,109,596)

| <b>Exposure pattern<sup>b</sup></b>       | <b>Number (%) of the cohort</b> |
|-------------------------------------------|---------------------------------|
| Never exposed                             | 8730547 (86.36)                 |
| Short-term exposure to ≤ 10 mg/day        | 36188 (0.36)                    |
| Short-term exposure to > 10 & ≤ 20 mg/day | 575048 (5.69)                   |
| Short-term exposure to > 20 & ≤ 30 mg/day | 89964 (0.89)                    |
| Short-term exposure to > 30 & ≤ 40 mg/day | 257200 (2.54)                   |
| Short-term exposure to > 40 mg/day        | 93533 (0.93)                    |
| Long-term exposure to ≤ 10 mg/day         | 43795 (0.43)                    |
| Long-term exposure to > 10 & ≤ 20 mg/day  | 12988 (0.13)                    |
| Long-term exposure to > 20 & ≤ 30 mg/day  | 4149 (0.04)                     |
| Long-term exposure to > 30 & ≤ 40 mg/day  | 9666 (0.10)                     |
| Long-term exposure to > 40 mg/day         | 4531 (0.04)                     |
| Exposed to multiple categories            | 251987 (2.49)                   |

<sup>a</sup> Systemic corticosteroid exposure during the risk period up to COVID-19 hospitalization or censoring is reported in this table (results differ slightly for death outcomes).

<sup>b</sup> A duration of less than 30 days was considered short-term. All doses were converted into prednisone equivalents.
