# Supplementary material for: Association between immunosuppressive medications and COVID-19 hospitalisation and death: a retrospective cohort study
Source: PubMed Central journal article supplement — BMJ Open. 2024 Dec 26;14(12):e087467. doi: 10.1136/bmjopen-2024-087467 (PMC11683992; doi:10.1136/bmjopen-2024-087467), 2024-12-26
Supplement: bmjopen-14-12-s011.pdf [file bmjopen-14-12-s011.pdf]

**Supplemental Table S3.** Unadjusted and adjusted hazard ratios showing associations between demographic and clinical characteristics with COVID-19 hospitalization in the general population cohort

| Variable                                | Unadjusted HR (95% CI)  | P-value <sup>a</sup> | Adjusted HR (95% CI)    | P-value <sup>a</sup> |
|-----------------------------------------|-------------------------|----------------------|-------------------------|----------------------|
| <b>Demographics</b>                     |                         |                      |                         |                      |
| Age (years)                             | 1.0487 (1.0483, 1.0492) | <.0001               | 1.0288 (1.0283, 1.0293) | <.0001               |
| Male vs. Female                         | 1.02 (1.005, 1.03)      | .007                 | 1.15 (1.13, 1.17)       | <.0001               |
| Gender Unknown/Missing vs. Female       | 0.76 (0.41, 1.41)       | .38                  | 1.82 (0.98, 3.39)       | .058                 |
| Asian vs. White                         | 0.34 (0.32, 0.36)       | <.0001               | 0.61 (0.58, 0.65)       | <.0001               |
| Black vs. White                         | 1.56 (1.53, 1.59)       | <.0001               | 1.19 (1.17, 1.22)       | <.0001               |
| Hispanic vs. White                      | 0.95 (0.93, 0.98)       | <.0001               | 1.10 (1.07, 1.12)       | <.0001               |
| Race unknown/missing vs. White          | 0.45 (0.44, 0.47)       | <.0001               | 0.99 (0.96, 1.02)       | .49                  |
| Midwest vs. South                       | 0.76 (0.75, 0.77)       | <.0001               | 0.98 (0.96, 0.995)      | .013                 |
| Northeast vs. South                     | 0.90 (0.88, 0.92)       | <.0001               | 0.88 (0.86, 0.90)       | <.0001               |
| West vs. South                          | 0.52 (0.50, 0.53)       | <.0001               | 0.85 (0.83, 0.87)       | <.0001               |
| Region unknown/missing vs. South        | 0.005 (0.003, 0.008)    | <.0001               | 0.01 (0.006, 0.02)      | <.0001               |
| <b>COVID-19 treatment</b>               |                         |                      |                         |                      |
| COVID-19 outpatient treatment           | 2.32 (2.23, 2.41)       | <.0001               | 3.29 (3.16, 3.43)       | <.0001               |
| Tixagevimab/cilgavimab treatment        | 0.60 (0.39, 0.91)       | .015                 | 0.02 (0.01, 0.04)       | <.0001               |
| <b>Comorbidities</b>                    |                         |                      |                         |                      |
| Current/former smoker vs. Never smoker  | 2.56 (2.50, 2.61)       | <.0001               | 1.55 (1.52, 1.59)       | <.0001               |
| Smoking status unknown vs. Never smoker | 0.70 (0.69, 0.72)       | <.0001               | 0.93 (0.91, 0.95)       | <.0001               |
| Previous COVID-19 infection             | 0.41 (0.40, 0.42)       | <.0001               | 0.276 (0.268, 0.284)    | <.0001               |
| At least one COVID-19 vaccination       | 0.269 (0.264, 0.273)    | <.0001               | 0.354 (0.347, 0.360)    | <.0001               |
| Asthma                                  | 1.71 (1.67, 1.75)       | <.0001               | 1.16 (1.13, 1.19)       | <.0001               |
| Autoimmune                              | 2.11 (2.07, 2.16)       | <.0001               | 0.99 (0.97, 1.02)       | .47                  |
| Cancer                                  | 2.80 (2.75, 2.87)       | <.0001               | 1.07 (1.05, 1.09)       | <.0001               |
| Cerebrovascular disease                 | 4.11 (4.02, 4.19)       | <.0001               | 1.16 (1.14, 1.19)       | <.0001               |
| Kidney disease                          | 5.07 (4.99, 5.15)       | <.0001               | 1.36 (1.33, 1.38)       | <.0001               |
| Liver disease                           | 2.43 (2.36, 2.51)       | <.0001               | 1.29 (1.25, 1.33)       | <.0001               |

|                          |                   |        |                   |        |
|--------------------------|-------------------|--------|-------------------|--------|
| Lung disease             | 5.41 (5.33, 5.50) | <.0001 | 1.40 (1.38, 1.43) | <.0001 |
| Diabetes                 | 4.15 (4.09, 4.21) | <.0001 | 1.60 (1.57, 1.62) | <.0001 |
| Disability               | 1.04 (0.99, 1.08) | .091   | 1.29 (1.24, 1.34) | <.0001 |
| Heart disease            | 5.21 (5.13, 5.28) | <.0001 | 1.42 (1.40, 1.44) | <.0001 |
| HIV                      | 1.39 (1.23, 1.58) | <.0001 | 1.07 (0.94, 1.21) | .29    |
| Primary immunodeficiency | 3.23 (2.95, 3.54) | <.0001 | 1.33 (1.21, 1.45) | <.0001 |
| Mental health disorder   | 2.05 (2.00, 2.10) | <.0001 | 1.17 (1.15, 1.20) | <.0001 |
| Neurologic               | 5.19 (5.06, 5.33) | <.0001 | 1.57 (1.53, 1.62) | <.0001 |
| Obesity                  | 2.14 (2.10, 2.17) | <.0001 | 1.18 (1.16, 1.20) | <.0001 |
| Pregnancy                | 1.64 (1.56, 1.72) | <.0001 | 6.09 (5.80, 6.40) | <.0001 |
| Solid organ transplant   | 6.58 (6.25, 6.94) | <.0001 | 1.92 (1.81, 2.04) | <.0001 |

HR = hazard ratio

<sup>a</sup>P-values calculated from Cox proportional hazards models.
