# Supplementary material for: Association between immunosuppressive medications and COVID-19 hospitalisation and death: a retrospective cohort study
Source: PubMed Central journal article supplement — BMJ Open. 2024 Dec 26;14(12):e087467. doi: 10.1136/bmjopen-2024-087467 (PMC11683992; doi:10.1136/bmjopen-2024-087467), 2024-12-26
Supplement: bmjopen-14-12-s012.pdf [file bmjopen-14-12-s012.pdf]

**Supplemental Table S4.** Unadjusted and adjusted hazard ratios showing associations between demographic and clinical characteristics with COVID-19 death in the general population cohort

| Variable                                        | Unadjusted HR (95% CI) | P-value <sup>a</sup> | Adjusted HR (95% CI) | P-value <sup>a</sup> |
|-------------------------------------------------|------------------------|----------------------|----------------------|----------------------|
| <b>Demographics</b>                             |                        |                      |                      |                      |
| Age (years)                                     | 1.075 (1.074, 1.076)   | <.0001               | 1.047 (1.046, 1.049) | <.0001               |
| Male vs. Female                                 | 1.25 (1.21, 1.29)      | <.0001               | 1.43 (1.38, 1.48)    | <.0001               |
| Gender Unknown/Missing vs. Female               | 0.95 (0.24, 3.80)      | .94                  | 3.52 (0.88, 14.08)   | .075                 |
| Asian vs. White                                 | 0.35 (0.30, 0.39)      | <.0001               | 0.71 (0.62, 0.81)    | <.0001               |
| Black vs. White                                 | 1.67 (1.60, 1.75)      | <.0001               | 1.21 (1.15, 1.27)    | <.0001               |
| Hispanic vs. White                              | 0.95 (0.90, 1.007)     | .089                 | 1.02 (0.97, 1.08)    | .39                  |
| Race unknown/missing vs. White                  | 0.41 (0.38, 0.44)      | <.0001               | 1.04 (0.96, 1.12)    | .34                  |
| Midwest vs. South                               | 0.66 (0.63, 0.68)      | <.0001               | 0.90 (0.86, 0.94)    | <.0001               |
| Northeast vs. South                             | 0.86 (0.82, 0.91)      | <.0001               | 0.80 (0.76, 0.85)    | <.0001               |
| West vs. South                                  | 0.43 (0.41, 0.46)      | <.0001               | 0.80 (0.76, 0.85)    | <.0001               |
| Region Other/Unknown vs. South <sup>b</sup>     | 0.008 (0.003, 0.022)   | <.0001               | 0.02 (0.01, 0.06)    | <.0001               |
| <b>COVID-19 treatment</b>                       |                        |                      |                      |                      |
| COVID-19 outpatient treatment                   | 1.51 (1.35, 1.70)      | <.0001               | 1.87 (1.66, 2.10)    | <.0001               |
| COVID-19 inpatient treatment                    | 32.28 (30.14, 34.56)   | <.0001               | 19.46 (17.83, 21.23) | <.0001               |
| Tixagevimab/cilgavimab treatment <sup>b,c</sup> | /                      | /                    | /                    | /                    |
| <b>Comorbidities</b>                            |                        |                      |                      |                      |
| Current/former smoker vs. Never smoker          | 2.72 (2.58, 2.88)      | <.0001               | 1.42 (1.34, 1.50)    | <.0001               |
| Smoking status unknown vs. Never smoker         | 0.92 (0.87, 0.97)      | .001                 | 1.29 (1.22, 1.36)    | <.0001               |
| Previous COVID-19 infection                     | 0.72 (0.68, 0.76)      | <.0001               | 0.28 (0.27, 0.30)    | <.0001               |
| At least one COVID-19 vaccination               | 0.053 (0.049, 0.058)   | <.0001               | 0.08 (0.07, 0.09)    | <.0001               |
| Asthma                                          | 1.47 (1.38, 1.57)      | <.0001               | 0.99 (0.92, 1.05)    | .67                  |
| Autoimmune                                      | 2.28 (2.17, 2.40)      | <.0001               | 1.01 (0.95, 1.06)    | .85                  |

|                          |                     |        |                    |        |
|--------------------------|---------------------|--------|--------------------|--------|
| Cancer                   | 3.46 (3.30, 3.63)   | <.0001 | 1.11 (1.06, 1.17)  | <.0001 |
| Cerebrovascular disease  | 4.74 (4.54, 4.96)   | <.0001 | 1.08 (1.03, 1.13)  | .002   |
| Kidney disease           | 7.36 (7.11, 7.62)   | <.0001 | 1.49 (1.43, 1.55)  | <.0001 |
| Liver disease            | 2.65 (2.46, 2.85)   | <.0001 | 1.38 (1.28, 1.49)  | <.0001 |
| Lung disease             | 6.74 (6.50, 6.99)   | <.0001 | 1.46 (1.40, 1.52)  | <.0001 |
| Diabetes                 | 5.57 (5.39, 5.76)   | <.0001 | 1.71 (1.65, 1.78)  | <.0001 |
| Disability               | 0.95 (0.86, 1.04)   | .26    | 1.32 (1.20, 1.47)  | <.0001 |
| Heart disease            | 7.39 (7.14, 7.64)   | <.0001 | 1.54 (1.48, 1.60)  | <.0001 |
| HIV                      | 1.27 (0.93, 1.74)   | .13    | 1.12 (0.82, 1.53)  | .47    |
| Primary immunodeficiency | 3.94 (3.24, 4.79)   | <.0001 | 1.46 (1.20, 1.78)  | .0002  |
| Mental health disorder   | 1.89 (1.79, 2.004)  | <.0001 | 1.06 (0.995, 1.12) | .071   |
| Neurologic               | 6.32 (5.96, 6.69)   | <.0001 | 1.4 (1.32, 1.49)   | <.0001 |
| Obesity                  | 2.25 (2.17, 2.33)   | <.0001 | 1.17 (1.12, 1.21)  | <.0001 |
| Pregnancy                | 0.14 (0.093, 0.197) | <.0001 | 1.10 (0.75, 1.61)  | .63    |
| Solid organ transplant   | 8.12 (7.26, 9.08)   | <.0001 | 1.92 (1.68, 2.19)  | <.0001 |

HR = hazard ratio

<sup>a</sup> P-values calculated from Cox proportional hazards models.

<sup>b</sup> We were not able to estimate a hazard ratio and corresponding p-value due to zero outcome events in the exposed group.

<sup>c</sup> The IR of those unexposed to tixagevimab/cilgavimab was 13783/8813080.8 PY = 1.6 Deaths/1000PY; The IR of those exposed to tixagevimab/cilgavimab was 0/4399.2 = 0 Deaths/1000PY.
