# Supplementary material for: Association between immunosuppressive medications and COVID-19 hospitalisation and death: a retrospective cohort study
Source: PubMed Central journal article supplement — BMJ Open. 2024 Dec 26;14(12):e087467. doi: 10.1136/bmjopen-2024-087467 (PMC11683992; doi:10.1136/bmjopen-2024-087467), 2024-12-26
Supplement: bmjopen-14-12-s013.pdf [file bmjopen-14-12-s013.pdf]

**Supplemental Table S5.** Incidence of COVID-19 hospitalization and death per 1000 Person-Years by demographics

| <b>COVID-19 hospitalization</b> | <b>Number of Cases</b> | <b>Number of Person-Years</b> | <b>Incidence Rate</b> |
|---------------------------------|------------------------|-------------------------------|-----------------------|
| <b>Race</b>                     |                        |                               |                       |
| Asian                           | 1257                   | 393790.2                      | 3.2                   |
| Black                           | 11960                  | 823629.7                      | 14.5                  |
| Hispanic/Latino                 | 8487                   | 957053.5                      | 8.9                   |
| White                           | 51292                  | 5516160.3                     | 9.3                   |
| Unknown                         | 4651                   | 1096051.3                     | 4.2                   |
| <b>Region</b>                   |                        |                               |                       |
| Midwest                         | 19665                  | 2393010.5                     | 8.2                   |
| Northeast                       | 10043                  | 1030349.3                     | 9.7                   |
| South                           | 39721                  | 3654368.6                     | 10.9                  |
| West                            | 8206                   | 1467726.6                     | 5.6                   |
| Unknown                         | 12                     | 241229.9                      | 0.0                   |
| <b>COVID-19 Death</b>           |                        |                               |                       |
| <b>COVID-19 Death</b>           | <b>Number of Cases</b> | <b>Number of Person-Years</b> | <b>Incidence Rate</b> |
| <b>Race</b>                     |                        |                               |                       |
| Asian                           | 223                    | 394260.9                      | 0.6                   |
| Black                           | 2274                   | 828296.3                      | 2.7                   |
| Hispanic/Latino                 | 1500                   | 960485.7                      | 1.6                   |
| White                           | 9048                   | 5536513.7                     | 1.6                   |
| Unknown                         | 738                    | 1097923.5                     | 0.7                   |
| <b>Region</b>                   |                        |                               |                       |
| Midwest                         | 3197                   | 2400882.2                     | 1.3                   |
| Northeast                       | 1805                   | 1033690.6                     | 1.7                   |
| South                           | 7483                   | 3670527.3                     | 2.0                   |
| West                            | >1283                  | /                             | 0.9                   |
| Unknown                         | <11                    | /                             | 0.0                   |

COVID-19 = Coronavirus Disease 2019

<sup>a</sup> To protect patient privacy, Optum Labs doesn't allow reporting of the true value of a count if it is less than 11. Only incidence rate was reported because the number of cases in the category is less than 11. The corresponding person-years are also not reported to prevent back calculation.
