# Supplementary material for: Association between immunosuppressive medications and COVID-19 hospitalisation and death: a retrospective cohort study
Source: PubMed Central journal article supplement — BMJ Open. 2024 Dec 26;14(12):e087467. doi: 10.1136/bmjopen-2024-087467 (PMC11683992; doi:10.1136/bmjopen-2024-087467), 2024-12-26

## Supplemental Methods 2. Corticosteroid exposure levels by dose and duration

Eleven corticosteroid exposure levels were defined:

- 1) Never exposed
- 2) Short-term exposure to prednisone equivalent doses of  $\leq 10$  mg/day
- 3) Short-term exposure to prednisone equivalent doses of  $> 10$  &  $\leq 20$  mg/day
- 4) Short-term exposure to prednisone equivalent doses of  $> 20$  &  $\leq 30$  mg/day
- 5) Short-term exposure to prednisone equivalent doses of  $> 30$  &  $\leq 40$  mg/day
- 6) Short-term exposure to prednisone equivalent doses of  $> 40$  mg/day
- 7) Long-term exposure to prednisone equivalent doses of  $\leq 10$  mg/day
- 8) Long-term exposure to prednisone equivalent doses of  $> 10$  &  $\leq 20$  mg/day
- 9) Long-term exposure to prednisone equivalent doses of  $> 20$  &  $\leq 30$  mg/day
- 10) Long-term exposure to prednisone equivalent doses of  $> 30$  &  $\leq 40$  mg/day
- 11) Long-term exposure to prednisone equivalent doses of  $> 40$  mg/day

Example classifications of systemic corticosteroid exposure level by duration and average daily dose.

### Short-term exposure to prednisone equivalent doses of $> 30$ & $\leq 40$ mg/day

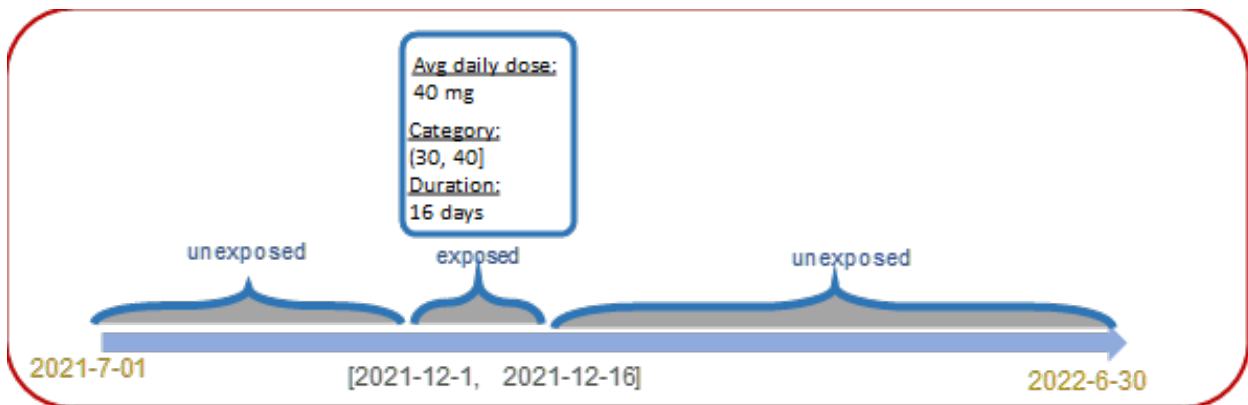

### Long-term exposure to prednisone equivalent doses of $> 30$ & $\leq 40$ mg/day

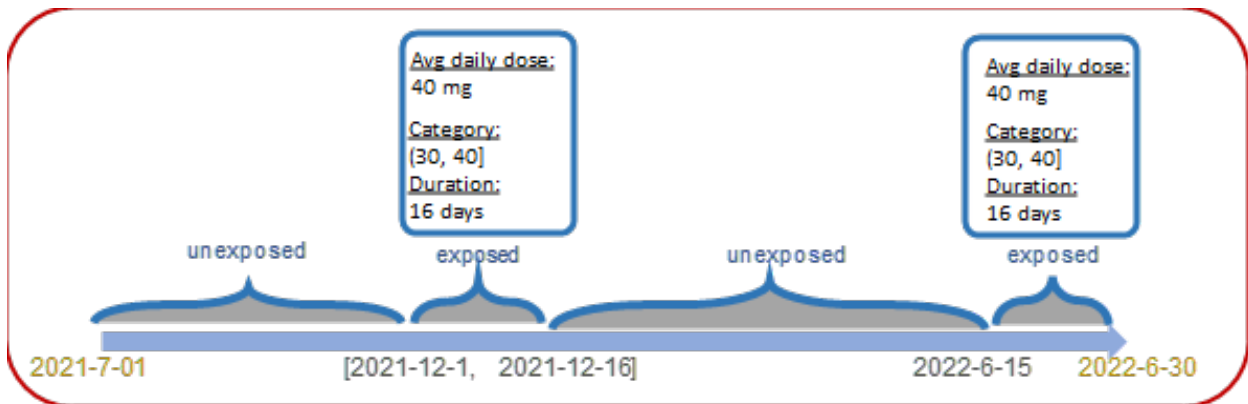

**Exposure to different levels of corticosteroid,  
categorized as long-term > 0 & ≤ 10 mg/day**

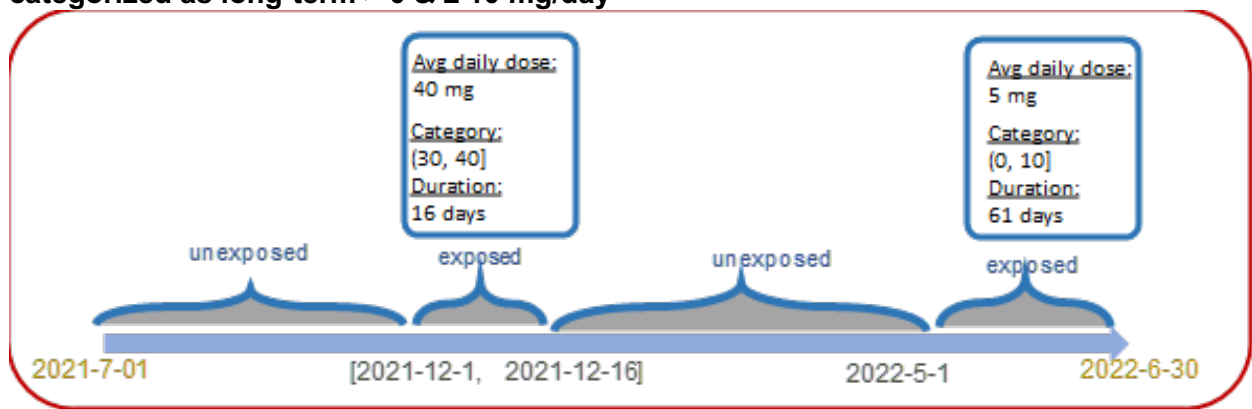

Supplement: bmjopen-14-12-s015.pdf [file bmjopen-14-12-s015.pdf]
