# Supplementary figures and images for: Association between immunosuppressive medications and COVID-19 hospitalisation and death: a retrospective cohort study
Source: PubMed Central journal article supplement — BMJ Open. 2024 Dec 26;14(12):e087467. doi: 10.1136/bmjopen-2024-087467 (PMC11683992; doi:10.1136/bmjopen-2024-087467), 2024-12-26

**eAppendix 1. Cohort selection flow diagram**

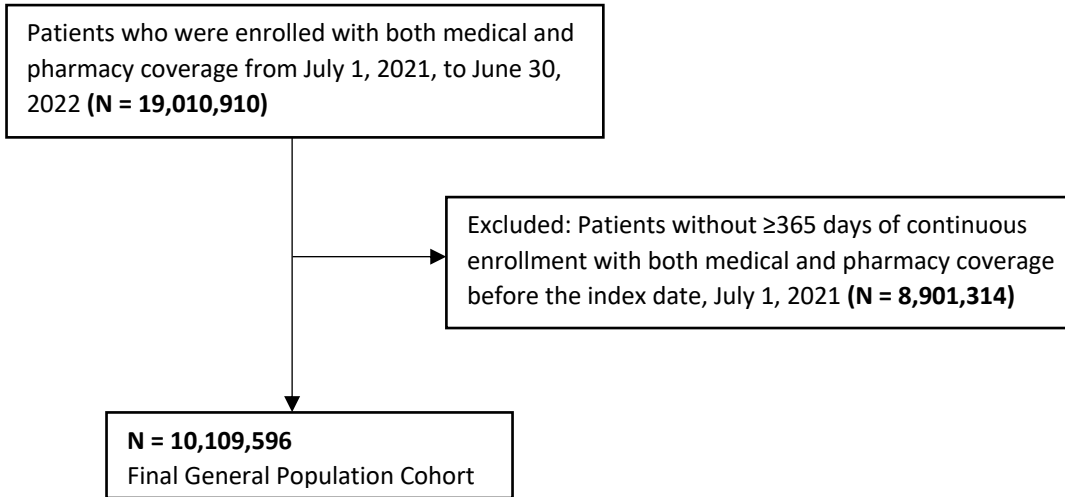

Supplement: bmjopen-14-12-s001.pdf [file bmjopen-14-12-s001.pdf]
